# Supplementary material for: Characterization of Myocardial Microstructure and Function in an Experimental Model of Isolated Subendocardial Damage
Source: PubMed Central journal article supplement — Hypertension. 2019 Jul 10;74(2):295–304. doi: 10.1161/HYPERTENSIONAHA.119.12956 (PMC6635061; doi:10.1161/hypertensionaha.119.12956), 2019-07-10
Supplement: hyp-74-295-s003.pdf [file hyp-74-295-s003.pdf]

# Change of Authorship Form

(Must be completed and signed by ALL authors)

Please check all that apply

New author(s) have been added (in addition to this form, all new authors must complete the copyright transfer agreement and conflict of interest disclosure.

Change in order of authorship.

An author wishes to remove his/her name. An author's name may only be removed his/her own request and a letter signed by the author should accompany this form

Manuscript Number HYPE201912956R1

Manuscript Title Characterization of Myocardial Microstructure and Function in an Experimental Model of Isolated Subendocardial Damage

## Former Authorship

Please list ALL AUTHORS in the same order as the original submission. For more than 12, use an extra sheet.

### Print Name

Name (1) Niklas Beyhoff  
Name (2) David Lohr  
Name (3) Anna Foryst-Ludwig  
Name (4) Robert Klopffleisch  
Name (5) Sarah Brix  
Name (6) Lasti Erfinanda

### Print Name

Name (7) Arata Tabuchi  
Name (8) Wolfgang M. Kuebler  
Name (9) Burkert Pieske  
Name (10) Laura M. Schreiber  
Name (11) Ulrich Kintscher  
Name (12) \_\_\_\_\_

## New Authorship

All authors must sign below agreeing to the changes in authorship. The authorship order must reflect the authorship order of the manuscript.

|                                      |                                                                                                       |                        |
|--------------------------------------|-------------------------------------------------------------------------------------------------------|------------------------|
| Name (1) <u>Niklas Beyhoff</u>       | Signature <u></u> | Date <u>05/08/2019</u> |
| Name (2) <u>David Lohr</u>           | Signature _____                                                                                       | Date _____             |
| Name (3) <u>Anna Foryst-Ludwig</u>   | Signature _____                                                                                       | Date _____             |
| Name (4) <u>Robert Klopffleisch</u>  | Signature _____                                                                                       | Date _____             |
| Name (5) <u>Sarah Brix</u>           | Signature _____                                                                                       | Date _____             |
| Name (6) <u>Jana Grune</u>           | Signature _____                                                                                       | Date _____             |
| Name (7) <u>Arne Thiele</u>          | Signature _____                                                                                       | Date _____             |
| Name (8) <u>Lasti Erfinanda</u>      | Signature _____                                                                                       | Date _____             |
| Name (9) <u>Arata Tabuchi</u>        | Signature _____                                                                                       | Date _____             |
| Name (10) <u>Wolfgang M. Kuebler</u> | Signature _____                                                                                       | Date _____             |
| Name (11) <u>Burkert Pieske</u>      | Signature _____                                                                                       | Date _____             |
| Name (12) <u>Laura M. Schreiber</u>  | Signature _____                                                                                       | Date _____             |
| Name (13) <u>Ulrich Kintscher</u>    | Signature _____                                                                                       | Date _____             |

Please print form and fax to 214-706-1565.

# Change of Authorship Form

---

(Must be completed and signed by ALL authors)

Please check all that apply

New author(s) have been added (in addition to this form, all new authors must complete the copyright transfer agreement and conflict of interest disclosure.

Change in order of authorship.

An author wishes to remove his/her name. An author's name may only be removed his/her own request and a letter signed by the author should accompany this form

Manuscript Number HYPE201912956R1

Manuscript Title Characterization of Myocardial Microstructure and Function in an Experimental Model of Isolated Subendocardial Damage

---

## Former Authorship

Please list ALL AUTHORS in the same order as the original submission. For more than 12, use an extra sheet.

### Print Name

Name (1) Niklas Beyhoff  
Name (2) David Lohr  
Name (3) Anna Foryst-Ludwig  
Name (4) Robert Klopffleisch  
Name (5) Sarah Brix  
Name (6) Lasti Erfinanda

### Print Name

Name (7) Arata Tabuchi  
Name (8) Wolfgang M. Kuebler  
Name (9) Burkert Pieske  
Name (10) Laura M. Schreiber  
Name (11) Ulrich Kintscher  
Name (12) \_\_\_\_\_

## New Authorship

All authors must sign below agreeing to the changes in authorship. The authorship order must reflect the authorship order of the manuscript.

|                                      |                             |                        |
|--------------------------------------|-----------------------------|------------------------|
| Name (1) <u>Niklas Beyhoff</u>       | Signature _____             | Date _____             |
| Name (2) <u>David Lohr</u>           | Signature <u>David Lohr</u> | Date <u>08.05.2019</u> |
| Name (3) <u>Anna Foryst-Ludwig</u>   | Signature _____             | Date _____             |
| Name (4) <u>Robert Klopffleisch</u>  | Signature _____             | Date _____             |
| Name (5) <u>Sarah Brix</u>           | Signature _____             | Date _____             |
| Name (6) <u>Jana Grune</u>           | Signature _____             | Date _____             |
| Name (7) <u>Arne Thiele</u>          | Signature _____             | Date _____             |
| Name (8) <u>Lasti Erfinanda</u>      | Signature _____             | Date _____             |
| Name (9) <u>Arata Tabuchi</u>        | Signature _____             | Date _____             |
| Name (10) <u>Wolfgang M. Kuebler</u> | Signature _____             | Date _____             |
| Name (11) <u>Burkert Pieske</u>      | Signature _____             | Date _____             |
| Name (12) <u>Laura M. Schreiber</u>  | Signature _____             | Date _____             |
| Name (13) <u>Ulrich Kintscher</u>    | Signature _____             | Date _____             |

Please print form and fax to 214-706-1565.

## Change of Authorship Form

(Must be completed and signed by ALL authors)

Please check all that apply

New author(s) have been added (in addition to this form, all new authors must complete the copyright transfer agreement and conflict of interest disclosure.

Change in order of authorship.

An author wishes to remove his/her name. An author's name may only be removed his/her own request and a letter signed by the author should accompany this form

Manuscript Number HYPE201912956R1

Manuscript Title Characterization of Myocardial Microstructure and Function in an Experimental Model of Isolated Subendocardial Damage

### Former Authorship

Please list ALL AUTHORS in the same order as the original submission. For more than 12, use an extra sheet.

#### Print Name

Name (1) Niklas Beyhoff  
Name (2) David Lohr  
Name (3) Anna Foryst-Ludwig  
Name (4) Robert Klopfleisch  
Name (5) Sarah Brix  
Name (6) Lasti Erfinanda

#### Print Name

Name (7) Arata Tabuchi  
Name (8) Wolfgang M. Kuebler  
Name (9) Burkert Pieske  
Name (10) Laura M. Schreiber  
Name (11) Ulrich Kintscher  
Name (12) \_\_\_\_\_

### New Authorship

All authors must sign below agreeing to the changes in authorship. The authorship order must reflect the authorship order of the manuscript.

|                                      |                                     |                        |
|--------------------------------------|-------------------------------------|------------------------|
| Name (1) <u>Niklas Beyhoff</u>       | Signature _____                     | Date _____             |
| Name (2) <u>David Lohr</u>           | Signature _____                     | Date _____             |
| Name (3) <u>Anna Foryst-Ludwig</u>   | Signature <u>Anna Foryst-Ludwig</u> | Date <u>05/08/19</u>   |
| Name (4) <u>Robert Klopfleisch</u>   | Signature _____                     | Date _____             |
| Name (5) <u>Sarah Brix</u>           | Signature _____                     | Date _____             |
| Name (6) <u>Jana Grune</u>           | Signature _____                     | Date _____             |
| Name (7) <u>Arne Thiele</u>          | Signature <u>Arne Thiele</u>        | Date <u>05/08/2019</u> |
| Name (8) <u>Lasti Erfinanda</u>      | Signature _____                     | Date _____             |
| Name (9) <u>Arata Tabuchi</u>        | Signature _____                     | Date _____             |
| Name (10) <u>Wolfgang M. Kuebler</u> | Signature _____                     | Date _____             |
| Name (11) <u>Burkert Pieske</u>      | Signature _____                     | Date _____             |
| Name (12) <u>Laura M. Schreiber</u>  | Signature _____                     | Date _____             |
| Name (13) <u>Ulrich Kintscher</u>    | Signature _____                     | Date _____             |

Please print form and fax to 214-706-1565.

# Change of Authorship Form

(Must be completed and signed by ALL authors)

Please check all that apply

New author(s) have been added (in addition to this form, all new authors must complete the copyright transfer agreement and conflict of interest disclosure.

Change in order of authorship.

An author wishes to remove his/her name. An author's name may only be removed his/her own request and a letter signed by the author should accompany this form

Manuscript Number HYPE201912956R1

Manuscript Title Characterization of Myocardial Microstructure and Function in an Experimental Model of Isolated Subendocardial Damage

## Former Authorship

Please list ALL AUTHORS in the same order as the original submission. For more than 12, use an extra sheet.

### Print Name

Name (1) Niklas Beyhoff  
Name (2) David Lohr  
Name (3) Anna Foryst-Ludwig  
Name (4) Robert Klopffleisch  
Name (5) Sarah Brix  
Name (6) Lasti Erfinanda

### Print Name

Name (7) Arata Tabuchi  
Name (8) Wolfgang M. Kuebler  
Name (9) Burkert Pieske  
Name (10) Laura M. Schreiber  
Name (11) Ulrich Kintscher  
Name (12) \_\_\_\_\_

## New Authorship

All authors must sign below agreeing to the changes in authorship. The authorship order must reflect the authorship order of the manuscript.

|                                      |                                                                                                |                      |
|--------------------------------------|------------------------------------------------------------------------------------------------|----------------------|
| Name (1) <u>Niklas Beyhoff</u>       | Signature _____                                                                                | Date _____           |
| Name (2) <u>David Lohr</u>           | Signature _____                                                                                | Date _____           |
| Name (3) <u>Anna Foryst-Ludwig</u>   | Signature _____                                                                                | Date _____           |
| Name (4) <u>Robert Klopffleisch</u>  | Signature  | Date <u>09.05.19</u> |
| Name (5) <u>Sarah Brix</u>           | Signature _____                                                                                | Date _____           |
| Name (6) <u>Jana Grune</u>           | Signature _____                                                                                | Date _____           |
| Name (7) <u>Arne Thiele</u>          | Signature _____                                                                                | Date _____           |
| Name (8) <u>Lasti Erfinanda</u>      | Signature _____                                                                                | Date _____           |
| Name (9) <u>Arata Tabuchi</u>        | Signature _____                                                                                | Date _____           |
| Name (10) <u>Wolfgang M. Kuebler</u> | Signature _____                                                                                | Date _____           |
| Name (11) <u>Burkert Pieske</u>      | Signature _____                                                                                | Date _____           |
| Name (12) <u>Laura M. Schreiber</u>  | Signature _____                                                                                | Date _____           |
| Name (13) <u>Ulrich Kintscher</u>    | Signature _____                                                                                | Date _____           |

Please print form and fax to 214-706-1565.

## Change of Authorship Form

(Must be completed and signed by ALL authors)

Please check all that apply

New author(s) have been added (in addition to this form, all new authors must complete the copyright transfer agreement and conflict of interest disclosure.

Change in order of authorship.

An author wishes to remove his/her name. An author's name may only be removed his/her own request and a letter signed by the author should accompany this form

Manuscript Number HYPE201912956R1

Manuscript Title Characterization of Myocardial Microstructure and Function in an Experimental Model of Isolated Subendocardial Damage

### Former Authorship

Please list ALL AUTHORS in the same order as the original submission. For more than 12, use an extra sheet.

#### Print Name

Name (1) Niklas Beyhoff  
Name (2) David Lohr  
Name (3) Anna Foryst-Ludwig  
Name (4) Robert Klopffleisch  
Name (5) Sarah Brix  
Name (6) Lasti Erfinanda

#### Print Name

Name (7) Arata Tabuchi  
Name (8) Wolfgang M. Kuebler  
Name (9) Burkert Pieske  
Name (10) Laura M. Schreiber  
Name (11) Ulrich Kintscher  
Name (12) \_\_\_\_\_

### New Authorship

All authors must sign below agreeing to the changes in authorship. The authorship order must reflect the authorship order of the manuscript.

|                                      |                       |                      |
|--------------------------------------|-----------------------|----------------------|
| Name (1) <u>Niklas Beyhoff</u>       | Signature _____       | Date _____           |
| Name (2) <u>David Lohr</u>           | Signature _____       | Date _____           |
| Name (3) <u>Anna Foryst-Ludwig</u>   | Signature _____       | Date _____           |
| Name (4) <u>Robert Klopffleisch</u>  | Signature _____       | Date _____           |
| Name (5) <u>Sarah Brix</u>           | Signature <u>Brix</u> | Date <u>11/05/13</u> |
| Name (6) <u>Jana Grune</u>           | Signature _____       | Date _____           |
| Name (7) <u>Arne Thiele</u>          | Signature _____       | Date _____           |
| Name (8) <u>Lasti Erfinanda</u>      | Signature _____       | Date _____           |
| Name (9) <u>Arata Tabuchi</u>        | Signature _____       | Date _____           |
| Name (10) <u>Wolfgang M. Kuebler</u> | Signature _____       | Date _____           |
| Name (11) <u>Burkert Pieske</u>      | Signature _____       | Date _____           |
| Name (12) <u>Laura M. Schreiber</u>  | Signature _____       | Date _____           |
| Name (13) <u>Ulrich Kintscher</u>    | Signature _____       | Date _____           |

Please print form and fax to 214-706-1565.

## Change of Authorship Form

---

(Must be completed and signed by ALL authors)

Please check all that apply

New author(s) have been added (in addition to this form, all new authors must complete the copyright transfer agreement and conflict of interest disclosure.

Change in order of authorship.

An author wishes to remove his/her name. An author's name may only be removed his/her own request and a letter signed by the author should accompany this form

**Manuscript Number** HYPE201912956R1

**Manuscript Title** Characterization of Myocardial Microstructure and Function in an Experimental Model of Isolated Subendocardial Damage

### Former Authorship

Please list ALL AUTHORS in the same order as the original submission. For more than 12, use an extra sheet.

#### Print Name

Name (1) Niklas Beyhoff  
Name (2) David Lohr  
Name (3) Anna Foryst-Ludwig  
Name (4) Robert Klopfleisch  
Name (5) Sarah Brix  
Name (6) Lasti Erfinanda

#### Print Name

Name (7) Arata Tabuchi  
Name (8) Wolfgang M. Kuebler  
Name (9) Burkert Pieske  
Name (10) Laura M. Schreiber  
Name (11) Ulrich Kintscher  
Name (12) \_\_\_\_\_

### New Authorship

All authors must sign below agreeing to the changes in authorship. The authorship order must reflect the authorship order of the manuscript.

|                                      |                             |                        |
|--------------------------------------|-----------------------------|------------------------|
| Name (1) <u>Niklas Beyhoff</u>       | Signature _____             | Date _____             |
| Name (2) <u>David Lohr</u>           | Signature _____             | Date _____             |
| Name (3) <u>Anna Foryst-Ludwig</u>   | Signature _____             | Date _____             |
| Name (4) <u>Robert Klopfleisch</u>   | Signature _____             | Date _____             |
| Name (5) <u>Sarah Brix</u>           | Signature _____             | Date _____             |
| Name (6) <u>Jana Grune</u>           | Signature <u>Jana Grune</u> | Date <u>08.05.2019</u> |
| Name (7) <u>Arne Thiele</u>          | Signature _____             | Date _____             |
| Name (8) <u>Lasti Erfinanda</u>      | Signature _____             | Date _____             |
| Name (9) <u>Arata Tabuchi</u>        | Signature _____             | Date _____             |
| Name (10) <u>Wolfgang M. Kuebler</u> | Signature _____             | Date _____             |
| Name (11) <u>Burkert Pieske</u>      | Signature _____             | Date _____             |
| Name (12) <u>Laura M. Schreiber</u>  | Signature _____             | Date _____             |
| Name (13) <u>Ulrich Kintscher</u>    | Signature _____             | Date _____             |

Please print form and fax to 214-706-1565.

# Change of Authorship Form

---

(Must be completed and signed by ALL authors)

Please check all that apply

New author(s) have been added (in addition to this form, all new authors must complete the copyright transfer agreement and conflict of interest disclosure.

Change in order of authorship.

An author wishes to remove his/her name. An author's name may only be removed his/her own request and a letter signed by the author should accompany this form

Manuscript Number HYPE201912956R1

Manuscript Title Characterization of Myocardial Microstructure and Function in an Experimental Model of Isolated Subendocardial Damage

## Former Authorship

Please list ALL AUTHORS in the same order as the original submission. For more than 12, use an extra sheet.

### Print Name

Name (1) Niklas Beyhoff  
Name (2) David Lohr  
Name (3) Anna Foryst-Ludwig  
Name (4) Robert Klopffleisch  
Name (5) Sarah Brix  
Name (6) Lasti Erfinanda

### Print Name

Name (7) Arata Tabuchi  
Name (8) Wolfgang M. Kuebler  
Name (9) Burkert Pieske  
Name (10) Laura M. Schreiber  
Name (11) Ulrich Kintscher  
Name (12) \_\_\_\_\_

## New Authorship

All authors must sign below agreeing to the changes in authorship. The authorship order must reflect the authorship order of the manuscript.

|                                      |                                                                                                |                        |
|--------------------------------------|------------------------------------------------------------------------------------------------|------------------------|
| Name (1) <u>Niklas Beyhoff</u>       | Signature _____                                                                                | Date _____             |
| Name (2) <u>David Lohr</u>           | Signature _____                                                                                | Date _____             |
| Name (3) <u>Anna Foryst-Ludwig</u>   | Signature _____                                                                                | Date _____             |
| Name (4) <u>Robert Klopffleisch</u>  | Signature _____                                                                                | Date _____             |
| Name (5) <u>Sarah Brix</u>           | Signature _____                                                                                | Date _____             |
| Name (6) <u>Jana Grune</u>           | Signature _____                                                                                | Date _____             |
| Name (7) <u>Arne Thiele</u>          | Signature _____                                                                                | Date _____             |
| Name (8) <u>Lasti Erfinanda</u>      | Signature  | Date <u>05/08/2019</u> |
| Name (9) <u>Arata Tabuchi</u>        | Signature _____                                                                                | Date _____             |
| Name (10) <u>Wolfgang M. Kuebler</u> | Signature _____                                                                                | Date _____             |
| Name (11) <u>Burkert Pieske</u>      | Signature _____                                                                                | Date _____             |
| Name (12) <u>Laura M. Schreiber</u>  | Signature _____                                                                                | Date _____             |
| Name (13) <u>Ulrich Kintscher</u>    | Signature _____                                                                                | Date _____             |

Please print form and fax to 214-706-1565.

# Change of Authorship Form

---

(Must be completed and signed by ALL authors)

Please check all that apply

New author(s) have been added (in addition to this form, all new authors must complete the copyright transfer agreement and conflict of interest disclosure.

Change in order of authorship.

An author wishes to remove his/her name. An author's name may only be removed his/her own request and a letter signed by the author should accompany this form

Manuscript Number HYPE201912956R1

Manuscript Title Characterization of Myocardial Microstructure and Function in an Experimental Model of Isolated Subendocardial Damage

## Former Authorship

Please list ALL AUTHORS in the same order as the original submission. For more than 12, use an extra sheet.

### Print Name

Name (1) Niklas Beyhoff  
Name (2) David Lohr  
Name (3) Anna Foryst-Ludwig  
Name (4) Robert Klopffleisch  
Name (5) Sarah Brix  
Name (6) Lasti Erfinanda

### Print Name

Name (7) Arata Tabuchi  
Name (8) Wolfgang M. Kuebler  
Name (9) Burkert Pieske  
Name (10) Laura M. Schreiber  
Name (11) Ulrich Kintscher  
Name (12) \_\_\_\_\_

## New Authorship

All authors must sign below agreeing to the changes in authorship. The authorship order must reflect the authorship order of the manuscript.

|                                      |                                |                        |
|--------------------------------------|--------------------------------|------------------------|
| Name (1) <u>Niklas Beyhoff</u>       | Signature _____                | Date _____             |
| Name (2) <u>David Lohr</u>           | Signature _____                | Date _____             |
| Name (3) <u>Anna Foryst-Ludwig</u>   | Signature _____                | Date _____             |
| Name (4) <u>Robert Klopffleisch</u>  | Signature _____                | Date _____             |
| Name (5) <u>Sarah Brix</u>           | Signature _____                | Date _____             |
| Name (6) <u>Jana Grune</u>           | Signature _____                | Date _____             |
| Name (7) <u>Arne Thiele</u>          | Signature _____                | Date _____             |
| Name (8) <u>Lasti Erfinanda</u>      | Signature _____                | Date _____             |
| Name (9) <u>Arata Tabuchi</u>        | Signature <u>Arata Tabuchi</u> | Date <u>05/09/2019</u> |
| Name (10) <u>Wolfgang M. Kuebler</u> | Signature _____                | Date _____             |
| Name (11) <u>Burkert Pieske</u>      | Signature _____                | Date _____             |
| Name (12) <u>Laura M. Schreiber</u>  | Signature _____                | Date _____             |
| Name (13) <u>Ulrich Kintscher</u>    | Signature _____                | Date _____             |

Please print form and fax to 214-706-1565.



# Change of Authorship Form

(Must be completed and signed by ALL authors)

Please check all that apply

New author(s) have been added (in addition to this form, all new authors must complete the copyright transfer agreement and conflict of interest disclosure.

Change in order of authorship.

An author wishes to remove his/her name. An author's name may only be removed his/her own request and a letter signed by the author should accompany this form

Manuscript Number HYPE201912956R1

Manuscript Title Characterization of Myocardial Microstructure and Function in an Experimental Model of Isolated Subendocardial Damage

## Former Authorship

Please list ALL AUTHORS in the same order as the original submission. For more than 12, use an extra sheet.

### Print Name

Name (1) Niklas Beyhoff  
Name (2) David Lohr  
Name (3) Anna Foryst-Ludwig  
Name (4) Robert Klopffleisch  
Name (5) Sarah Brix  
Name (6) Lasti Erfinanda

### Print Name

Name (7) Arata Tabuchi  
Name (8) Wolfgang M. Kuebler  
Name (9) Burkert Pieske  
Name (10) Laura M. Schreiber  
Name (11) Ulrich Kintscher  
Name (12) \_\_\_\_\_

## New Authorship

All authors must sign below agreeing to the changes in authorship. The authorship order must reflect the authorship order of the manuscript.

|                                      |                                      |                      |
|--------------------------------------|--------------------------------------|----------------------|
| Name (1) <u>Niklas Beyhoff</u>       | Signature _____                      | Date _____           |
| Name (2) <u>David Lohr</u>           | Signature _____                      | Date _____           |
| Name (3) <u>Anna Foryst-Ludwig</u>   | Signature _____                      | Date _____           |
| Name (4) <u>Robert Klopffleisch</u>  | Signature _____                      | Date _____           |
| Name (5) <u>Sarah Brix</u>           | Signature _____                      | Date _____           |
| Name (6) <u>Jana Grune</u>           | Signature _____                      | Date _____           |
| Name (7) <u>Arne Thiele</u>          | Signature _____                      | Date _____           |
| Name (8) <u>Lasti Erfinanda</u>      | Signature _____                      | Date _____           |
| Name (9) <u>Arata Tabuchi</u>        | Signature _____                      | Date _____           |
| Name (10) <u>Wolfgang M. Kuebler</u> | Signature <u>Wolfgang M. Kuebler</u> | Date <u>05/08/19</u> |
| Name (11) <u>Burkert Pieske</u>      | Signature _____                      | Date _____           |
| Name (12) <u>Laura M. Schreiber</u>  | Signature _____                      | Date _____           |
| Name (13) <u>Ulrich Kintscher</u>    | Signature _____                      | Date _____           |

Please print form and fax to 214-706-1565.

## Change of Authorship Form

(Must be completed and signed by ALL authors)

Please check all that apply

New author(s) have been added (in addition to this form, all new authors must complete the copyright transfer agreement and conflict of interest disclosure.

Change in order of authorship.

An author wishes to remove his/her name. An author's name may only be removed his/her own request and a letter signed by the author should accompany this form

Manuscript Number HYPE201912956R1

Manuscript Title Characterization of Myocardial Microstructure and Function in an Experimental Model of Isolated Subendocardial Damage

### Former Authorship

Please list ALL AUTHORS in the same order as the original submission. For more than 12, use an extra sheet.

#### Print Name

Name (1) Niklas Beyhoff  
Name (2) David Lohr  
Name (3) Anna Foryst-Ludwig  
Name (4) Robert Klopfleisch  
Name (5) Sarah Brix  
Name (6) Lasti Erfinanda

#### Print Name

Name (7) Arata Tabuchi  
Name (8) Wolfgang M. Kuebler  
Name (9) Burkert Pieske  
Name (10) Laura M. Schreiber  
Name (11) Ulrich Kintscher  
Name (12) \_\_\_\_\_

### New Authorship

All authors must sign below agreeing to the changes in authorship. The authorship order must reflect the authorship order of the manuscript.

|                                      |                                                                                                |                      |
|--------------------------------------|------------------------------------------------------------------------------------------------|----------------------|
| Name (1) <u>Niklas Beyhoff</u>       | Signature _____                                                                                | Date _____           |
| Name (2) <u>David Lohr</u>           | Signature _____                                                                                | Date _____           |
| Name (3) <u>Anna Foryst-Ludwig</u>   | Signature _____                                                                                | Date _____           |
| Name (4) <u>Robert Klopfleisch</u>   | Signature _____                                                                                | Date _____           |
| Name (5) <u>Sarah Brix</u>           | Signature _____                                                                                | Date _____           |
| Name (6) <u>Jana Grune</u>           | Signature _____                                                                                | Date _____           |
| Name (7) <u>Arne Thiele</u>          | Signature _____                                                                                | Date _____           |
| Name (8) <u>Lasti Erfinanda</u>      | Signature _____                                                                                | Date _____           |
| Name (9) <u>Arata Tabuchi</u>        | Signature _____                                                                                | Date _____           |
| Name (10) <u>Wolfgang M. Kuebler</u> | Signature _____                                                                                | Date _____           |
| Name (11) <u>Burkert Pieske</u>      | Signature 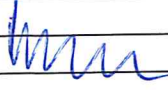 | Date <u>10/05/19</u> |
| Name (12) <u>Laura M. Schreiber</u>  | Signature _____                                                                                | Date _____           |
| Name (13) <u>Ulrich Kintscher</u>    | Signature _____                                                                                | Date _____           |

Please print form and fax to 214-706-1565.

## Change of Authorship Form

(Must be completed and signed by ALL authors)

Please check all that apply

New author(s) have been added (in addition to this form, all new authors must complete the copyright transfer agreement and conflict of interest disclosure.

Change in order of authorship.

An author wishes to remove his/her name. An author's name may only be removed his/her own request and a letter signed by the author should accompany this form

Manuscript Number HYPE201912956R1

Manuscript Title Characterization of Myocardial Microstructure and Function in an Experimental Model of Isolated Subendocardial Damage

### Former Authorship

Please list ALL AUTHORS in the same order as the original submission. For more than 12, use an extra sheet.

#### Print Name

Name (1) Niklas Beyhoff  
Name (2) David Lohr  
Name (3) Anna Foryst-Ludwig  
Name (4) Robert Klopfleisch  
Name (5) Sarah Brix  
Name (6) Lasti Erfinanda

#### Print Name

Name (7) Arata Tabuchi  
Name (8) Wolfgang M. Kuebler  
Name (9) Burkert Pieske  
Name (10) Laura M. Schreiber  
Name (11) Ulrich Kintscher  
Name (12) \_\_\_\_\_

### New Authorship

All authors must sign below agreeing to the changes in authorship. The authorship order must reflect the authorship order of the manuscript.

|                                      |                                                                                                |                      |
|--------------------------------------|------------------------------------------------------------------------------------------------|----------------------|
| Name (1) <u>Niklas Beyhoff</u>       | Signature _____                                                                                | Date _____           |
| Name (2) <u>David Lohr</u>           | Signature _____                                                                                | Date _____           |
| Name (3) <u>Anna Foryst-Ludwig</u>   | Signature _____                                                                                | Date _____           |
| Name (4) <u>Robert Klopfleisch</u>   | Signature _____                                                                                | Date _____           |
| Name (5) <u>Sarah Brix</u>           | Signature _____                                                                                | Date _____           |
| Name (6) <u>Jana Grune</u>           | Signature _____                                                                                | Date _____           |
| Name (7) <u>Arne Thiele</u>          | Signature _____                                                                                | Date _____           |
| Name (8) <u>Lasti Erfinanda</u>      | Signature _____                                                                                | Date _____           |
| Name (9) <u>Arata Tabuchi</u>        | Signature _____                                                                                | Date _____           |
| Name (10) <u>Wolfgang M. Kuebler</u> | Signature _____                                                                                | Date _____           |
| Name (11) <u>Burkert Pieske</u>      | Signature _____                                                                                | Date _____           |
| Name (12) <u>Laura M. Schreiber</u>  | Signature  | Date <u>05/08/09</u> |
| Name (13) <u>Ulrich Kintscher</u>    | Signature _____                                                                                | Date _____           |

Please print form and fax to 214-706-1565.

## Change of Authorship Form

(Must be completed and signed by ALL authors)

Please check all that apply

New author(s) have been added (in addition to this form, all new authors must complete the copyright transfer agreement and conflict of interest disclosure.

Change in order of authorship.

An author wishes to remove his/her name. An author's name may only be removed his/her own request and a letter signed by the author should accompany this form

Manuscript Number HYPE201912956R1

Manuscript Title Characterization of Myocardial Microstructure and Function in an Experimental Model of Isolated Subendocardial Damage

### Former Authorship

Please list ALL AUTHORS in the same order as the original submission. For more than 12, use an extra sheet.

#### Print Name

Name (1) Niklas Beyhoff  
Name (2) David Lohr  
Name (3) Anna Foryst-Ludwig  
Name (4) Robert Klopfleisch  
Name (5) Sarah Brix  
Name (6) Lasti Erfinanda

#### Print Name

Name (7) Arata Tabuchi  
Name (8) Wolfgang M. Kuebler  
Name (9) Burkert Pieske  
Name (10) Laura M. Schreiber  
Name (11) Ulrich Kintscher  
Name (12) \_\_\_\_\_

### New Authorship

All authors must sign below agreeing to the changes in authorship. The authorship order must reflect the authorship order of the manuscript.

|                                      |                                                                                                |                      |
|--------------------------------------|------------------------------------------------------------------------------------------------|----------------------|
| Name (1) <u>Niklas Beyhoff</u>       | Signature _____                                                                                | Date _____           |
| Name (2) <u>David Lohr</u>           | Signature _____                                                                                | Date _____           |
| Name (3) <u>Anna Foryst-Ludwig</u>   | Signature _____                                                                                | Date _____           |
| Name (4) <u>Robert Klopfleisch</u>   | Signature _____                                                                                | Date _____           |
| Name (5) <u>Sarah Brix</u>           | Signature _____                                                                                | Date _____           |
| Name (6) <u>Jana Grune</u>           | Signature _____                                                                                | Date _____           |
| Name (7) <u>Arne Thiele</u>          | Signature _____                                                                                | Date _____           |
| Name (8) <u>Lasti Erfinanda</u>      | Signature _____                                                                                | Date _____           |
| Name (9) <u>Arata Tabuchi</u>        | Signature _____                                                                                | Date _____           |
| Name (10) <u>Wolfgang M. Kuebler</u> | Signature _____                                                                                | Date _____           |
| Name (11) <u>Burkert Pieske</u>      | Signature _____                                                                                | Date _____           |
| Name (12) <u>Laura M. Schreiber</u>  | Signature _____                                                                                | Date _____           |
| Name (13) <u>Ulrich Kintscher</u>    | Signature  | Date <u>05-09-19</u> |

Please print form and fax to 214-706-1565.
